# Supplementary material
Source: PubMed Central journal article supplement (PMC1317953)

| Probe:       | mut |   |   |   | wt |   |   |   | wt |     |     |       |
|--------------|-----|---|---|---|----|---|---|---|----|-----|-----|-------|
| Antibody:    | -   | - | - | - | -  | - | - | - | -  | Sp1 | Sp3 | β-gal |
| Sp1 protein: | -   | + | - | + | -  | + | - | + | +  | +   | +   | +     |
| Sp3 protein: | -   | - | + | + | -  | - | + | + | +  | +   | +   | +     |

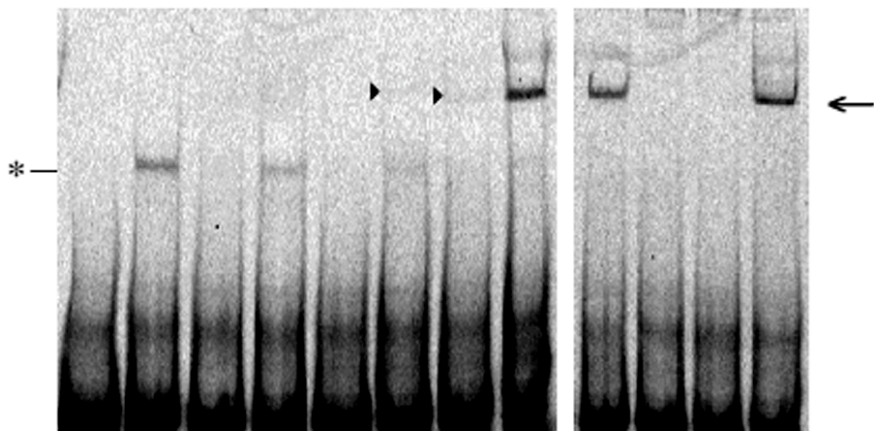

Supplement: pnas_0508964102_3.pdf [file pnas_0508964102_3.pdf]
